# Supplementary material for: Yielding and shear induced melting of 2D mixed crystals of spheres and dimers
Source: Royal Society of Chemistry journal article supplement (doi:10.1039/c2sm07318h), 2012-01-01
Supplement: c2sm07318h.pdf [file c2sm07318h.pdf]

### **S1.avi**

#### **Title- Solid phase at low shear rate for sparsely doped mixed crystal of spheres and dimers**

##### Description:

Simulation movie spanning 50 time units for low shear ( $\dot{\gamma}=0.005$ ) solid phase of mixed crystal with a dimer fraction of 0.02. For spheres, lobes with 5, 6, and 7 neighbors are colored red, yellow, and cyan, respectively. For dimers, lobes with 5, 6, and 7 neighbors are colored orange, blue, and green, respectively. A pair of 7 and 5 neighbor lobes forms a dislocation while a vacancy is an empty lattice site. The crystal relaxes the strain by rotating as a whole; also notice the dislocations zipping freely across the spherical particle region while being blocked by dimers.

##### Tags:

Solid phase, dislocations, vacancies, shear induced melting, mixed crystals

### **S2.avi**

#### **Title- Hexatic-like phase at intermediate shear rates for sparsely doped mixed crystal of spheres and dimers.**

##### Description:

Simulation movie spanning 50 time units for intermediate shear ( $\dot{\gamma}=0.035$ ) hexatic-like phase of mixed crystal with a dimer fraction of 0.02. Color scheme is the same as that for movie file S1.avi. Dislocations form a transient grain boundary across which the crystal strains at different shear rates.

##### Tags:

Hexatic-like phase, dislocations, vacancies, shear induced melting, mixed crystals

### **S3.avi**

#### **Title- Liquid phase at high shear rates for sparsely doped mixed crystal of spheres and dimers**

##### Description:

Simulation movie spanning 50 time units for high shear ( $\dot{\gamma}=0.1$ ) liquid phase of mixed crystal with a dimer fraction of 0.02. Color scheme is the same as that for movie file S1.avi. The dislocations become homogeneously distributed through the system, with the system shearing freely.

##### Tags:

Liquid phase, dislocations, vacancies, shear induced melting, mixed crystals

#### **S4.avi**

##### **Title- Solid phase at low shear rates for highly doped mixed crystal of spheres and dimers**

###### Description:

Simulation movie spanning 50 time units for low shear ( $\dot{\gamma}=0.002$ ) solid phase of mixed crystal with a dimer fraction of 0.7. Color scheme is the same as that for movie file S1.avi. Both dislocation motion and vacancy diffusion are highly restricted; the system shears through dislocations hopping across dislocation cages.

###### Tags:

Solid phase, dislocations, vacancies, shear induced melting, mixed crystals

#### **S5.avi**

##### **Title- Hexatic-like phase at intermediate shear rates for highly doped mixed crystal of spheres and dimers**

###### Description:

Simulation movie spanning 50 time units for intermediate shear ( $\dot{\gamma}=0.016$ ) hexatic-like phase of mixed crystal with a dimer fraction of 0.7. Color scheme is the same as that for movie file S1.avi. Dislocations are restricted but form a transient grain boundary at the top, across which the crystal strains at different shear rates.

###### Tags:

Hexatic-like phase, dislocations, vacancies, shear induced melting, mixed crystals

#### **S6.avi**

##### **Title- Liquid phase at high shear rates for highly doped mixed crystal of spheres and dimers**

###### Description:

Simulation movie spanning 50 time units for high shear ( $\dot{\gamma}=0.04$ ) liquid phase of mixed crystal with a dimer fraction of 0.7. Color scheme is the same as that for movie file S1.avi. The system shears homogeneously by formation of smaller dislocation grains distributed throughout the system.

###### Tags:

Liquid phase, dislocations, vacancies, shear induced melting, mixed crystals
